# Supplementary material for: Mining the transcriptome of target tissues of autoimmune and degenerative pancreatic β-cell and brain diseases to discover therapies
Source: PubMed Central journal article supplement (PMC9636054; doi:10.1016/j.isci.2022.105376), 2022-10-17
Supplement: mmc1.pdf [file mmc1.pdf]

**iScience, Volume 25**

**Supplemental information**

**Mining the transcriptome of target tissues  
of autoimmune and degenerative pancreatic  $\beta$ -cell  
and brain diseases to discover therapies**

**Xiaoyan Yi, Bianca Marmontel de Souza, Toshiaki Sawatani, Florian Szymczak, Lorella Marselli, Piero Marchetti, Miriam Cnop, and Decio L. Eizirik**

## Supplementary Information

### Supplementary Figures

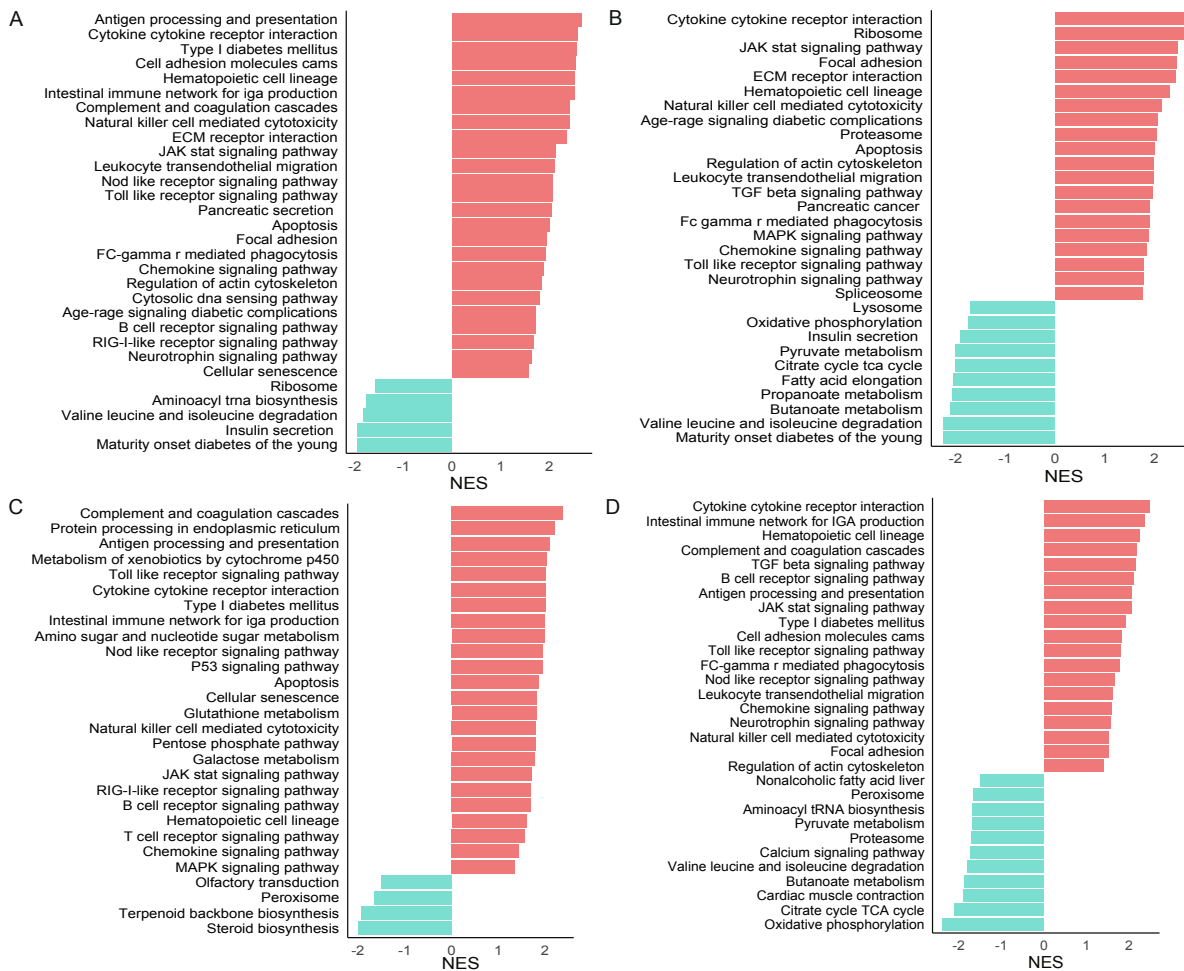

**Figure S1. Overview of the enriched top 30 KEGG signaling pathways in the target tissues of the four diseases, related to Figure 1.** Gene set enrichment analysis (GSEA) of (A) T1D, (B) T2D, (C) MS, and (D) AD using the KEGG database. Bars in red and blue represent positive and negative enrichment in the associated pathways, respectively. The x-axis shows the normalized enrichment score (NES) of the *fgSEA* analysis, and the y-axis shows the enriched pathways with an adjusted *P*-value <0.05.

| T1D upregulated genes |           |          |                                  |                                      | T1D downregulated genes |            |          |                                  |                                      |
|-----------------------|-----------|----------|----------------------------------|--------------------------------------|-------------------------|------------|----------|----------------------------------|--------------------------------------|
| Motif                 | Name      | P-value  | % of Target Sequences with Motif | % of Background Sequences with Motif | Motif                   | Name       | P-value  | % of Target Sequences with Motif | % of Background Sequences with Motif |
|                       | bZIP:IRF  | 1.00E-04 | 46.13%                           | 35.42%                               |                         | ZNF16      | 1.00E-03 | 6.15%                            | 1.54%                                |
|                       | IRF2      | 1.00E-04 | 19.64%                           | 11.97%                               |                         | Atf4       | 1.00E-02 | 34.62%                           | 22.59%                               |
|                       | IRF8      | 1.00E-03 | 44.35%                           | 35.09%                               |                         | NFAT       | 1.00E-02 | 78.46%                           | 66.29%                               |
|                       | IRF1      | 1.00E-03 | 23.21%                           | 15.96%                               |                         | Oct4:Sox17 | 1.00E-02 | 21.54%                           | 12.36%                               |
|                       | PU.1:IRF8 | 1.00E-03 | 30.36%                           | 22.57%                               |                         | REST-NRSF  | 1.00E-02 | 5.38%                            | 1.41%                                |
|                       | T1SRE     | 1.00E-02 | 3.57%                            | 1.22%                                |                         | Cux2       | 1.00E-02 | 46.92%                           | 34.69%                               |
|                       | GATA:SCL  | 1.00E-02 | 17.86%                           | 12.08%                               |                         | RUNX-AML   | 1.00E-02 | 65.38%                           | 54.57%                               |
|                       | NFAT      | 1.00E-02 | 74.40%                           | 66.73%                               |                         |            |          |                                  |                                      |
|                       | MyoD      | 1.00E-02 | 74.40%                           | 67.06%                               |                         |            |          |                                  |                                      |
|                       | SpiB      | 1.00E-02 | 35.42%                           | 28.15%                               |                         |            |          |                                  |                                      |

  

| T2D upregulated genes |               |          |                                  |                                      | T2D downregulated genes |           |          |                                   |                                      |
|-----------------------|---------------|----------|----------------------------------|--------------------------------------|-------------------------|-----------|----------|-----------------------------------|--------------------------------------|
| Motif                 | Name          | P-value  | % of Target Sequences with Motif | % of Background Sequences with Motif | Motif                   | Name      | P-value  | % of Targets Sequences with Motif | % of Background Sequences with Motif |
|                       | IRF2          | 1.00E-05 | 18.14%                           | 11.81%                               |                         | REST-NRSF | 1.00E-05 | 4.22%                             | 1.23%                                |
|                       | IRF1          | 1.00E-05 | 22.71%                           | 15.72%                               |                         | Sp5       | 1.00E-03 | 89.36%                            | 83.91%                               |
|                       | Twist2        | 1.00E-05 | 94.79%                           | 89.76%                               |                         | Sp2       | 1.00E-03 | 94.58%                            | 90.41%                               |
|                       | OCT4-SOX2-TCF | 1.00E-05 | 22.56%                           | 15.90%                               |                         | Cux2      | 1.00E-03 | 46.39%                            | 39.03%                               |
|                       | -NANOG        | 1.00E-05 | 22.56%                           | 15.90%                               |                         | KLF14     | 1.00E-03 | 95.78%                            | 91.98%                               |
|                       | NeuroG2       | 1.00E-04 | 91.96%                           | 86.44%                               |                         | ZNF467    | 1.00E-03 | 82.13%                            | 76.00%                               |
|                       | MyoD          | 1.00E-04 | 75.08%                           | 67.48%                               |                         | Tbx20     | 1.00E-02 | 26.31%                            | 20.49%                               |
|                       | BHLHA15       | 1.00E-04 | 89.75%                           | 84.10%                               |                         | MYB       | 1.00E-02 | 95.38%                            | 92.04%                               |
|                       | Tcf21         | 1.00E-04 | 80.60%                           | 73.89%                               |                         | HNF6      | 1.00E-02 | 52.81%                            | 46.41%                               |
|                       | IRF8          | 1.00E-04 | 42.11%                           | 34.65%                               |                         | Sox3      | 1.00E-02 | 89.56%                            | 85.32%                               |
|                       | TCF4          | 1.00E-04 | 91.01%                           | 85.91%                               |                         |           |          |                                   |                                      |

  

| MS upregulated genes |            |          |                                  |                                      | MS downregulated genes |       |          |                                  |                                      |
|----------------------|------------|----------|----------------------------------|--------------------------------------|------------------------|-------|----------|----------------------------------|--------------------------------------|
| Motif                | Motif Name | P-value  | % of Target Sequences with Motif | % of Background Sequences with Motif | Motif                  | Name  | P-value  | % of Target Sequences with Motif | % of Background Sequences with Motif |
|                      | STAT4      | 1.00E-03 | 81.06%                           | 70.57%                               |                        | Ap4   | 1.00E-06 | 87.16%                           | 78.78%                               |
|                      | HRE        | 1.00E-03 | 31.72%                           | 21.63%                               |                        | Gata6 | 1.00E-05 | 71.28%                           | 62.43%                               |
|                      | Atf3       | 1.00E-03 | 56.39%                           | 45.20%                               |                        | Tcf12 | 1.00E-04 | 80.24%                           | 73.03%                               |
|                      | Tbr1       | 1.00E-03 | 88.99%                           | 80.57%                               |                        | GATA3 | 1.00E-04 | 85.64%                           | 79.49%                               |
|                      | Bapx1      | 1.00E-02 | 97.80%                           | 93.01%                               |                        | TRPS1 | 1.00E-04 | 92.23%                           | 87.28%                               |
|                      | BATF       | 1.00E-02 | 54.63%                           | 44.32%                               |                        | Sox7  | 1.00E-03 | 33.61%                           | 26.58%                               |
|                      | SF1        | 1.00E-02 | 50.22%                           | 40.31%                               |                        | Pit1  | 1.00E-03 | 68.41%                           | 61.05%                               |
|                      | Fra1       | 1.00E-02 | 49.78%                           | 40.05%                               |                        | Tcf21 | 1.00E-03 | 78.55%                           | 71.96%                               |
|                      | Fos        | 1.00E-02 | 51.10%                           | 41.55%                               |                        | Brm1  | 1.00E-03 | 32.94%                           | 26.23%                               |
|                      | JunB       | 1.00E-02 | 48.90%                           | 39.56%                               |                        | E2A   | 1.00E-03 | 91.05%                           | 86.27%                               |

  

| AD upregulated genes |          |          |                                  |                                      | AD downregulated genes |           |          |                                  |                                      |
|----------------------|----------|----------|----------------------------------|--------------------------------------|------------------------|-----------|----------|----------------------------------|--------------------------------------|
| Motif                | Name     | P-value  | % of Target Sequences with Motif | % of Background Sequences with Motif | Motif                  | Name      | P-value  | % of Target Sequences with Motif | % of Background Sequences with Motif |
|                      | Fox:Ebox | 1.00E-03 | 80.26%                           | 68.11%                               |                        | REST-NRSF | 1.00E-02 | 4.97%                            | 1.59%                                |
|                      | NFAT     | 1.00E-02 | 82.89%                           | 72.51%                               |                        |           |          |                                  |                                      |
|                      | Fli1     | 1.00E-02 | 90.79%                           | 82.29%                               |                        |           |          |                                  |                                      |
|                      | ZNF519   | 1.00E-02 | 38.16%                           | 27.93%                               |                        |           |          |                                  |                                      |
|                      | Hoxd13   | 1.00E-02 | 93.42%                           | 86.42%                               |                        |           |          |                                  |                                      |
|                      | FOXA1    | 1.00E-02 | 86.18%                           | 78.03%                               |                        |           |          |                                  |                                      |
|                      | HOXB13   | 1.00E-02 | 84.21%                           | 75.85%                               |                        |           |          |                                  |                                      |
|                      | Sox7     | 1.00E-02 | 37.50%                           | 28.25%                               |                        |           |          |                                  |                                      |
|                      | FoxD3    | 1.00E-02 | 76.32%                           | 67.09%                               |                        |           |          |                                  |                                      |
|                      | ZNF165   | 1.00E-02 | 26.97%                           | 18.85%                               |                        |           |          |                                  |                                      |

**Figure S2. Transcription factor binding site motif analysis reveals potential upstream regulators of the modified genes in the four diseases, related to Figure 1.** The promoter regions (transcription start site  $\pm$  2kb) of the differentially expressed genes in each disease were analyzed using *HOMER* tools to predict known transcription factor binding site motifs. Tables show the sequence motifs, name, *P*-value and frequency (%) in target as well in background sequences. Top 10 transcription factor binding sites enriched in up- and downregulated genes of (A) T1D, (B) T2D, (C) MS and (D) AD are displayed

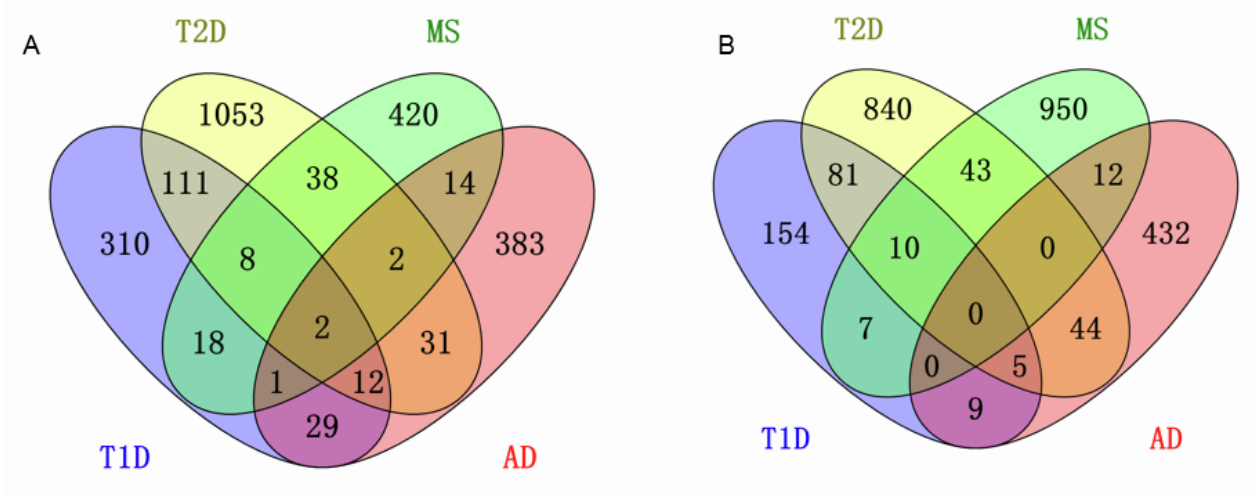

**Figure S3: Venn diagrams of differentially expressed genes in T1D, T2D, MS and AD in bulk RNA-seq data, related to Figure 1.** Venn diagrams of (A) upregulated and (B) downregulated genes in the four diseases. Differential expression was assessed with *DESeq2* 1.28.1 and genes were selected with an adjusted *P*-value <0.10 (Benjamini Hochberg correction). Sample sizes for the data are as follows: T1D (n = 4 for patients, n = 10 for controls); T2D (n = 28 for patients, n = 183 for controls); MS (n = 5 for patients, n = 5 for controls); AD (n = 122 for patients, n = 80 for controls).

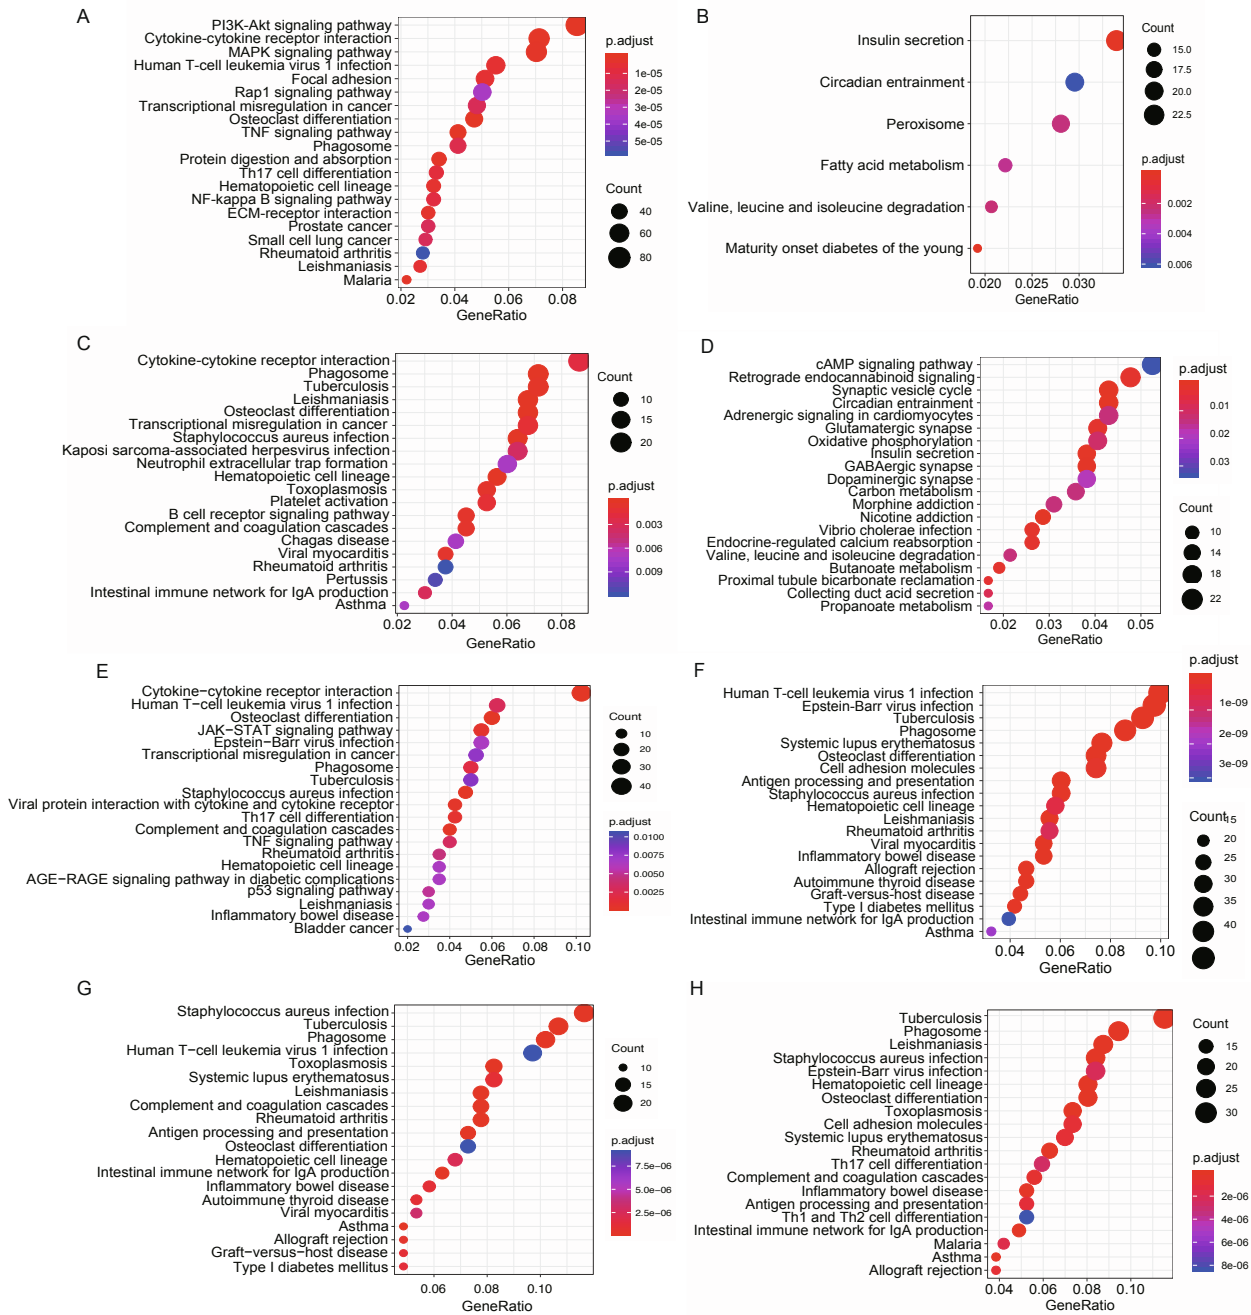

**Figure S4. Functional enrichment analysis of overlapped genes among the four diseases, related to Figures 2 and 3.** Genes significantly overlapped between different pairs of diseases detected in the RRHO analysis (Figure 2) were selected for enrichment analysis using the *clusterProfiler* via the KEGG database. The top 20 gene sets are represented according to their adjusted P-values (Benjamini Hochberg correction) and their gene ratio (no. of modified genes/gene set size). Enriched pathways by genes significantly (A) upregulated both in T2D and T1D, (B) downregulated both in T2D and T1D, (C) upregulated both in T2D and AD, (D) downregulated both in T2D and AD, (E) upregulated both in T2D and MS, (F) upregulated both in MS and T1D, (G) upregulated both in MS and AD, and (H) upregulated both in AD and T1D are displayed.

| Motif | Name         | P-value  | % of Target Sequences with Motif | % of Background Sequences with Motif |
|-------|--------------|----------|----------------------------------|--------------------------------------|
|       | MafK         | 1.00E-04 | 30.00%                           | 19.71%                               |
|       | Tbx6         | 1.00E-02 | 85.00%                           | 77.13%                               |
|       | FosI2        | 1.00E-02 | 35.77%                           | 26.98%                               |
|       | OCT4-SOX2-   | 1.00E-02 | 21.54%                           | 14.62%                               |
|       | TCF-NANOG    | 1.00E-02 | 21.54%                           | 14.62%                               |
|       | Twist2       | 1.00E-02 | 95.38%                           | 90.34%                               |
|       | Twist2       | 1.00E-02 | 95.38%                           | 90.34%                               |
|       | MafA         | 1.00E-02 | 68.46%                           | 60.23%                               |
|       | NF-E2        | 1.00E-02 | 8.08%                            | 4.28%                                |
|       | HIF2a        | 1.00E-02 | 48.08%                           | 40.11%                               |
|       | NFkB-p65-Rel | 1.00E-02 | 12.69%                           | 7.96%                                |
|       | NFkB-p65     | 1.00E-02 | 65.77%                           | 58.06%                               |

  

| Motif | Name      | P-value  | % of Target Sequences with Motif | % of Background Sequences with Motif |
|-------|-----------|----------|----------------------------------|--------------------------------------|
|       | ZNF416    | 1.00E-04 | 93.33%                           | 83.44%                               |
|       | Atoh1     | 1.00E-03 | 84.62%                           | 74.07%                               |
|       | REST-NRSF | 1.00E-03 | 5.13%                            | 1.33%                                |
|       | NRSF      | 1.00E-03 | 5.13%                            | 1.33%                                |
|       | Znf263    | 1.00E-03 | 98.46%                           | 93.00%                               |
|       | PGR       | 1.00E-02 | 29.74%                           | 20.69%                               |
|       | Olig2     | 1.00E-02 | 96.41%                           | 90.68%                               |
|       | Nr5a2     | 1.00E-02 | 66.67%                           | 56.39%                               |
|       | ZNF675    | 1.00E-02 | 24.10%                           | 16.14%                               |
|       | Pax7      | 1.00E-02 | 16.92%                           | 10.24%                               |
|       | Tbet      | 1.00E-02 | 81.03%                           | 72.45%                               |

  

| Motif | Name           | P-value  | % of Target Sequences with Motif | % of Background Sequences with Motif |
|-------|----------------|----------|----------------------------------|--------------------------------------|
|       | Tlx            | 1.00E-03 | 50.38%                           | 39.27%                               |
|       | CEBP           | 1.00E-03 | 63.26%                           | 52.85%                               |
|       | Tcf12          | 1.00E-03 | 79.92%                           | 70.88%                               |
|       | SpiB           | 1.00E-03 | 37.88%                           | 28.65%                               |
|       | MITF           | 1.00E-02 | 71.21%                           | 62.76%                               |
|       | HRE            | 1.00E-02 | 24.24%                           | 17.23%                               |
|       | E2F            | 1.00E-02 | 14.02%                           | 8.65%                                |
|       | EW5:ERG-fusion | 1.00E-02 | 71.97%                           | 63.64%                               |
|       | MyoD           | 1.00E-02 | 71.59%                           | 63.63%                               |
|       | HRE            | 1.00E-02 | 30.30%                           | 23.16%                               |

  

| Motif | Name      | P-value  | % of Target Sequences with Motif | % of Background Sequences with Motif |
|-------|-----------|----------|----------------------------------|--------------------------------------|
|       | REST-NRSF | 1.00E-10 | 8.79%                            | 1.40%                                |
|       | Olig2     | 1.00E-03 | 96.65%                           | 90.84%                               |
|       | ZNF652    | 1.00E-03 | 36.40%                           | 26.32%                               |
|       | ZNF519    | 1.00E-03 | 46.03%                           | 35.47%                               |
|       | Pit1      | 1.00E-02 | 37.24%                           | 28.18%                               |
|       | NFkB-p65  | 1.00E-02 | 65.69%                           | 56.29%                               |
|       | DUX4      | 1.00E-02 | 8.79%                            | 4.36%                                |
|       | Gfi1b     | 1.00E-02 | 59.83%                           | 50.40%                               |
|       | EAR2      | 1.00E-02 | 89.12%                           | 82.39%                               |
|       | Zfp281    | 1.00E-02 | 47.28%                           | 38.83%                               |

  

| Motif | Name   | P-value  | % of Target Sequences with Motif | % of Background Sequences with Motif |
|-------|--------|----------|----------------------------------|--------------------------------------|
|       | HRE    | 1.00E-03 | 31.42%                           | 22.17%                               |
|       | ISRE   | 1.00E-02 | 12.64%                           | 7.32%                                |
|       | Zfp809 | 1.00E-02 | 48.28%                           | 39.18%                               |
|       | STAT4  | 1.00E-02 | 79.31%                           | 71.20%                               |
|       | HRE    | 1.00E-02 | 24.90%                           | 17.93%                               |
|       | IRF1   | 1.00E-02 | 22.22%                           | 15.69%                               |
|       | VDR    | 1.00E-02 | 33.33%                           | 26.20%                               |
|       | MafA   | 1.00E-02 | 67.82%                           | 60.15%                               |
|       | Six1   | 1.00E-02 | 29.89%                           | 23.19%                               |

  

| Motif | Name     | P-value  | % of Target Sequences with Motif | % of Background Sequences with Motif |
|-------|----------|----------|----------------------------------|--------------------------------------|
|       | IRF8     | 1.00E-03 | 47.35%                           | 35.58%                               |
|       | SpiB     | 1.00E-03 | 38.78%                           | 28.39%                               |
|       | IRF3     | 1.00E-03 | 44.49%                           | 33.83%                               |
|       | NFkB-p65 | 1.00E-03 | 66.53%                           | 56.35%                               |
|       | Hoxd10   | 1.00E-02 | 80.41%                           | 71.62%                               |
|       | Bcl11a   | 1.00E-02 | 69.39%                           | 60.54%                               |
|       | IRF1     | 1.00E-02 | 23.27%                           | 16.27%                               |
|       | Tlx      | 1.00E-02 | 50.61%                           | 41.88%                               |
|       | NPAS     | 1.00E-02 | 89.39%                           | 83.16%                               |
|       | ZNF317   | 1.00E-02 | 14.69%                           | 9.38%                                |

  

| Motif | Name      | P-value  | % of Target Sequences with Motif | % of Background Sequences with Motif |
|-------|-----------|----------|----------------------------------|--------------------------------------|
|       | SpiB      | 1.00E-04 | 41.49%                           | 28.87%                               |
|       | NPAS2     | 1.00E-03 | 80.08%                           | 70.46%                               |
|       | PU.1      | 1.00E-03 | 61.00%                           | 50.47%                               |
|       | IRF8      | 1.00E-02 | 46.47%                           | 36.97%                               |
|       | T1ISRE    | 1.00E-02 | 4.15%                            | 1.42%                                |
|       | HRE       | 1.00E-02 | 31.54%                           | 23.64%                               |
|       | AMYB      | 1.00E-02 | 91.70%                           | 85.72%                               |
|       | NPAS      | 1.00E-02 | 88.80%                           | 82.58%                               |
|       | MITF      | 1.00E-02 | 71.37%                           | 63.31%                               |
|       | PU.1:IRF8 | 1.00E-02 | 31.12%                           | 23.75%                               |

  

| Motif | Name     | P-value  | % of Target Sequences with Motif | % of Background Sequences with Motif |
|-------|----------|----------|----------------------------------|--------------------------------------|
|       | SpiB     | 1.00E-06 | 43.02%                           | 28.66%                               |
|       | STAT4    | 1.00E-03 | 83.40%                           | 73.63%                               |
|       | PU.1     | 1.00E-03 | 60.75%                           | 50.44%                               |
|       | bZIP:IRF | 1.00E-03 | 49.43%                           | 39.59%                               |
|       | p53      | 1.00E-02 | 12.83%                           | 7.58%                                |
|       | p63      | 1.00E-02 | 38.11%                           | 29.70%                               |
|       | NFkB-p50 | 1.00E-02 | 26.79%                           | 19.38%                               |
|       | Tlx      | 1.00E-02 | 47.92%                           | 39.60%                               |
|       | T1ISRE   | 1.00E-02 | 3.77%                            | 1.39%                                |
|       | IRF1     | 1.00E-02 | 23.77%                           | 17.37%                               |

**Figure S5. Transcription factor binding site motif analysis reveals the potential TFs controlling commonly up- or downregulated genes in pairs of diseases, related to Figures 2 and 3.** The promoter regions (transcription start site  $\pm$  2kb) of the top 300 commonly up- or downregulated genes in each pair of diseases from RRHO analysis (Figure 2) were analyzed using the *HOMER* tools. Tables show the sequence motifs, name, *P*-value and frequency (%) in target as well as in background sequences. Top 10 transcription factor binding sites enriched in genes (A) upregulated in T2D and T1D, (B) downregulated in T2D and T1D, (C) upregulated in T2D and AD, (D) downregulated in T2D and AD, (E) upregulated in T2D and MS, (F) upregulated in MS and T1D, (G) upregulated in MS and AD, (H) upregulated in AD and T1D.

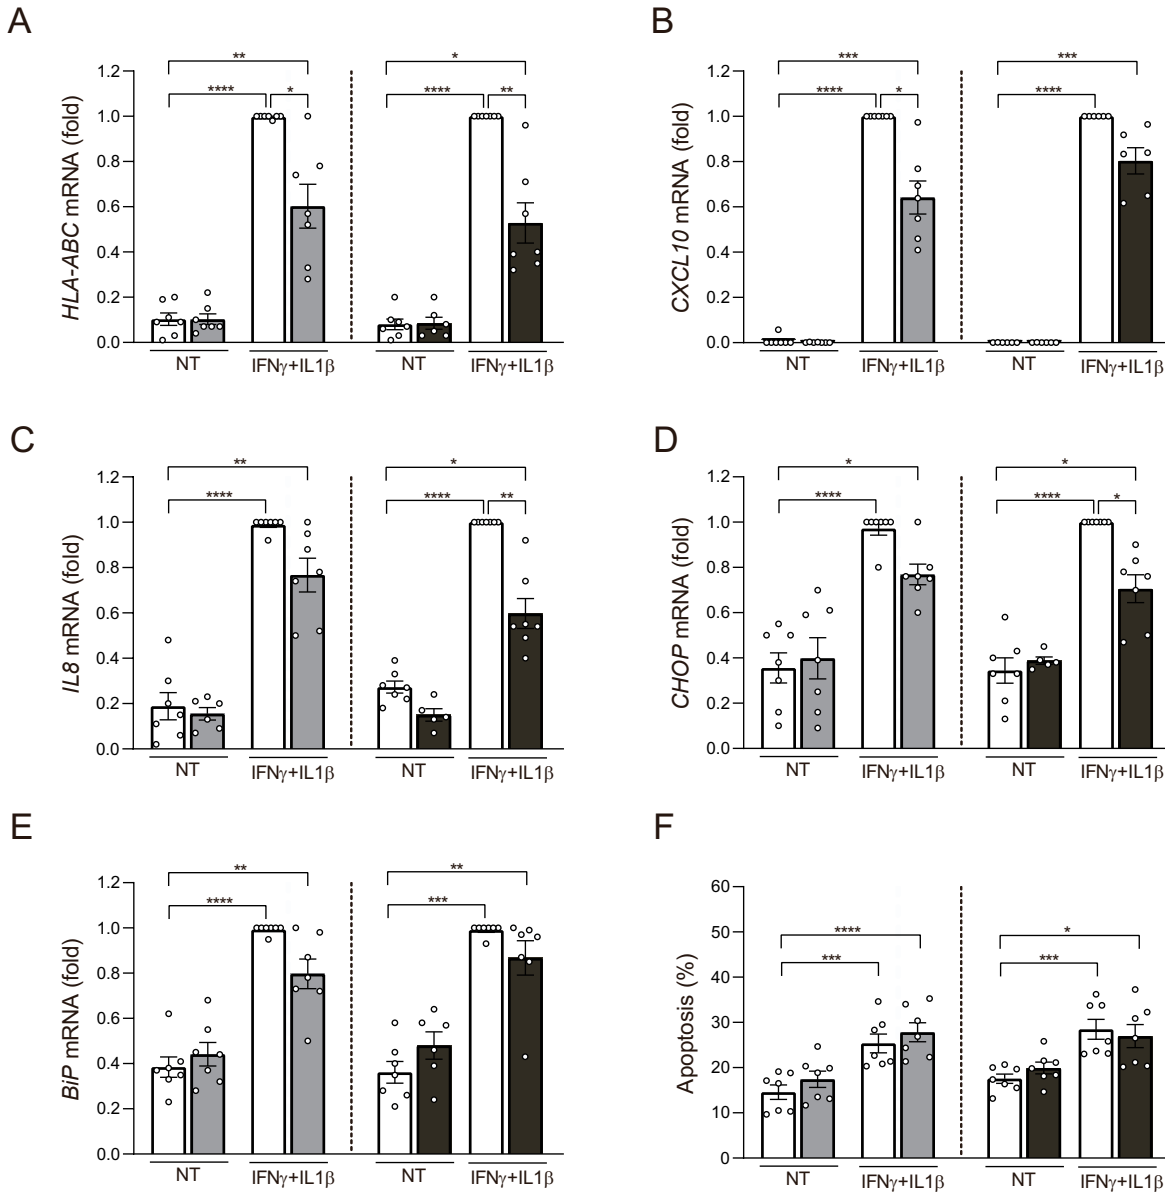

**Figure S6. Bromodomain inhibitors attenuate cytokine-induced pro-inflammatory gene expression in EndoC- $\beta$ H1 cells, related to Figures 4 and 5.** EndoC- $\beta$ H1 cells were pretreated for 6 h with the bromodomain inhibitors iBET-151 (1  $\mu$ M, grey bars) or GSK046 (1  $\mu$ M, black bars) and then exposed to IFN $\gamma$  (1000 U/ml) and IL1 $\beta$  (50 U/ml) or not (non-treated, NT) for 24 h. mRNA expression of *HLA-ABC*, *CXCL10*, *IL-8* and the ER stress markers *CHOP* and *BiP* were analyzed by quantitative real-time PCR. Values were normalized to the geometric mean of the reference genes  $\beta$ -actin and VAPA; the highest value of each experiment was considered as 1. (F) The percentage of apoptotic cells was counted after 24 h by Hoechst 33342 and propidium iodide staining. Results are mean  $\pm$  SEM of 5-7 independent experiments. \* $p$ <0.05, \*\* $p$ <0.005, \*\*\* $p$ <0.001 and \*\*\*\* $p$ <0.0001 by ANOVA followed by Bonferroni correction for multiple comparisons.

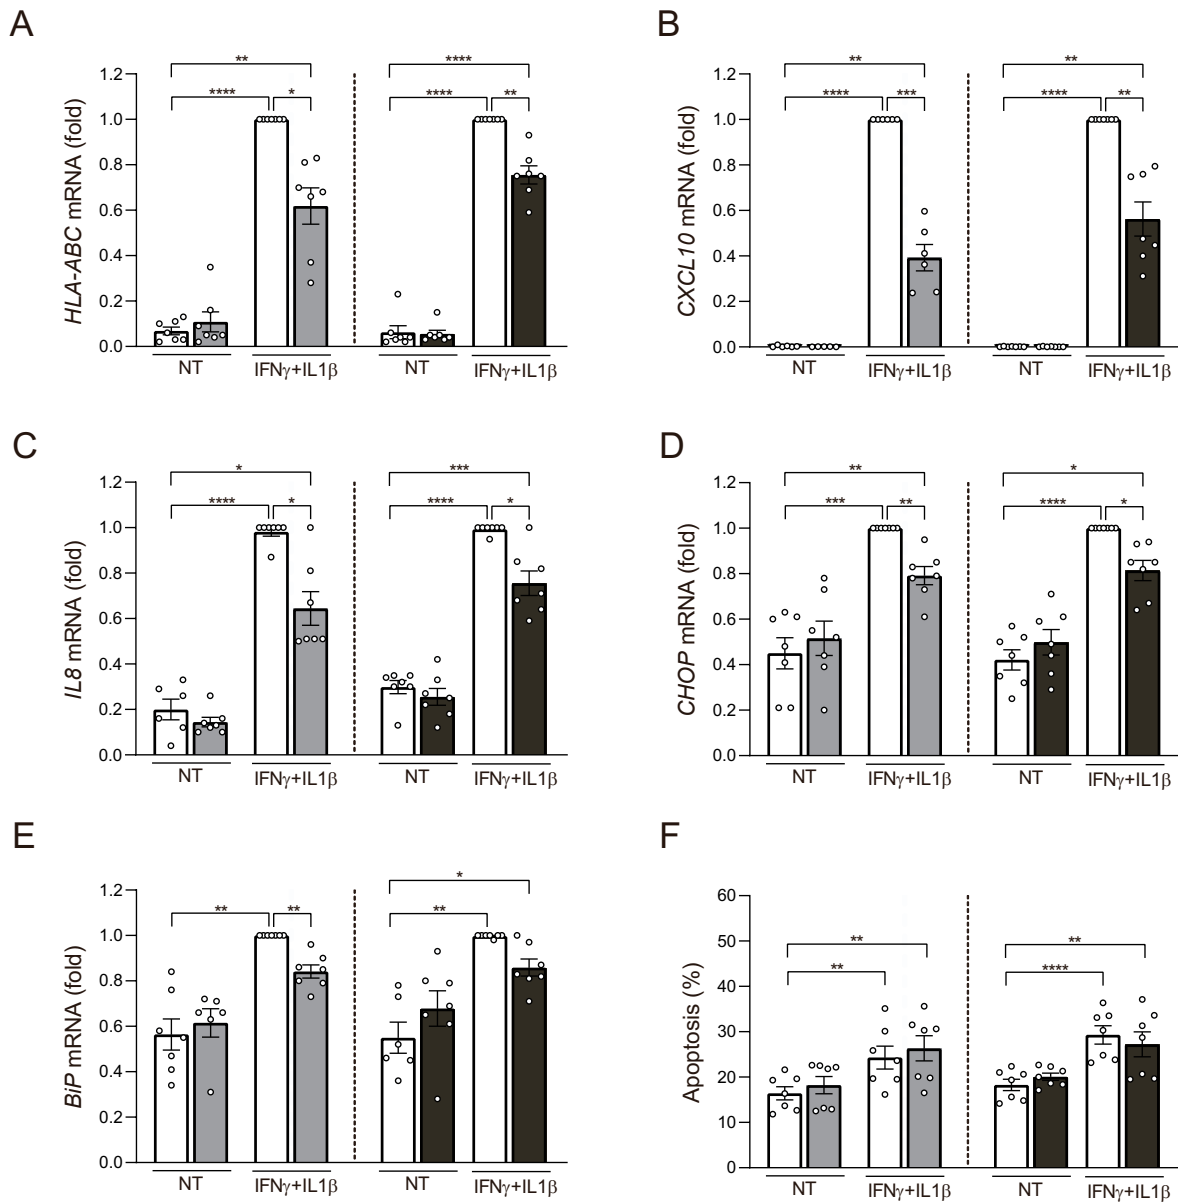

**Figure S7. Bromodomain inhibitors attenuate cytokine-induced pro-inflammatory gene expression in EndoC- $\beta$ H1 cells, related to Figures 4 and 5.** EndoC- $\beta$ H1 cells were pretreated for 6 h with the bromodomain inhibitors iBET-151 (1  $\mu$ M, grey bars) or GSK046 (1  $\mu$ M, black bars) and then exposed to IFN $\gamma$  (1000 U/ml) and IL1 $\beta$  (50 U/ml) or not (non-treated, NT) for 48 h. mRNA expression of *HLA-ABC*, *CXCL10*, *IL-8* and the ER stress markers *CHOP* and *BIP* were analyzed by quantitative real-time PCR. Values were normalized to the geometric mean of the reference genes  *$\beta$ -actin* and *VAPA*; the highest value of each experiment was considered as 1. (F) The percentage of apoptotic cells was counted after 48 h by Hoechst 33342 and propidium iodide staining. Results are mean  $\pm$  SEM of 5-7 independent experiments. \* $p$ <0.05, \*\* $p$ <0.005, \*\*\* $p$ <0.001 and \*\*\*\* $p$ <0.0001 by ANOVA followed by Bonferroni correction for multiple comparisons.



Supplementary Tables

**Table S1. Expression of leukocyte marker CD45 in the target tissues of four diseases, related to Figure 1.**

| Disease | Target tissue      | Mean TPM in controls | Mean TPM in cases | TPM ratio | log <sub>2</sub> fold change | Adjusted <i>P</i> -value |
|---------|--------------------|----------------------|-------------------|-----------|------------------------------|--------------------------|
| T1D     | Pancreatic β-cells | 2.6 ± 2.0            | 15.7 ± 18.1       | 5.9       | 1.8                          | 0.069                    |
| T2D     | Pancreatic islets  | 1.0 ± 0.6            | 1.8 ± 1.2         | 1.7       | 0.59                         | 0.006                    |
| MS      | Optic chiasm       | 9.3 ± 4.2            | 21.7 ± 20.3       | 2.3       | 0.74                         | 0.587                    |
| AD      | Prefrontal cortex  | 6.3 ± 3.0            | 8.1 ± 5.2         | 1.3       | 0.36                         | 0.023                    |

CD45 gene expression is displayed as mean ± standard deviation of TPM (Transcript per Million) in cases and controls of the four diseases. Gene expression was quantified using *Salmon 1.4.0*. Mean TPM and TPM ratio were calculated for cases and controls. The log<sub>2</sub> fold change (considering both fold change and estimation for dispersions) and adjusted *P*-value (Benjamini-Hochberg correction) were computed by R package *DESeq2 1.28.1*.

**Table S4. Characteristics of human islet donors, related to Figures 5, 6, and 7.**

|         | Age (years) | Gender | BMI (kg/m <sup>2</sup> ) | Cause of death | β-cell purity (%) |
|---------|-------------|--------|--------------------------|----------------|-------------------|
| Donor 1 | 63          | Male   | 21.2                     | CVD            | 37                |
| Donor 2 | 78          | Male   | 25.5                     | CVD            | 63                |
| Donor 3 | 78          | Female | 26.7                     | CVD            | 59                |
| Donor 4 | 86          | Female | 22.9                     | CVD            | 63                |
| Donor 5 | 91          | Female | 22.2                     | CVD            | 65                |
| Donor 6 | 89          | Female | 23.4                     | CVD            | 20                |
| Donor 7 | 49          | Female | 31.2                     | CVD            | 53                |
| Donor 8 | 78          | Female | 25.7                     | CVD            | 54                |

BMI (body mass index); CVD (cardiovascular disease). β-cell purity was assessed by immunostaining for insulin.

**Table S5. Sequence of quantitative real-time qPCR primers, related to Figures 5, 7, S6 and S7.**

| <b>Gene</b>         | <b>Primer sequence (5' -&gt; 3')</b>      | <b>Direction</b> |
|---------------------|-------------------------------------------|------------------|
| <i>ACTB</i>         | CTGTACGCCAACACAGTGCT                      | Forward          |
|                     | GCTCAGGAGGAGCAATGATC                      | Reverse          |
| <i>VAPA</i>         | TACCGAAACAAGGAAACTAATGGAA                 | Forward          |
|                     | GCCTTAAACCTTCATCTCTCAGGT                  | Reverse          |
| <i>CXCL10</i>       | GTGGCATTCAAGGAGTACCTC                     | Forward          |
|                     | GCCTTCGATTCTGGATTCAG                      | Reverse          |
| <i>HLA-ABC</i>      | CAGGAGACACGGAATGTGAA                      | Forward          |
|                     | TTATCTGGATGGTGTGAGAACC                    | Reverse          |
| <i>IL-6</i>         | AAAAGATGGCTGAAAAAGATGG                    | Forward          |
|                     | CTACTCTCAAATCTGTTCTGG                     | Reverse          |
| <i>IL-8</i>         | TGTAAACATGACTTCCAAGCT                     | Forward          |
|                     | TTGGAGTATGTCTTTATGCAC                     | Reverse          |
| <i>CXCL1</i>        | AGAACATCCAAAGTGTGAAC                      | Forward          |
|                     | TTTCTTAACTATGGGGGATG                      | Reverse          |
| spliced <i>XBP1</i> | CCGCAGCAGGTGCAGG                          | Forward          |
|                     | GAGTCAATACCGCCAGAATCCA                    | Reverse          |
| <i>BIP</i>          | Qiagen QuantiTect primer, cat# QT00096404 | Forward          |
|                     |                                           | Reverse          |
| <i>CHOP</i>         | Qiagen QuantiTect primer, cat# QT00082278 | Forward          |
|                     |                                           | Reverse          |
